# Supplementary material
Source: PubMed Central journal article supplement (PMC7243589)

## **SUPPLEMENTARY MATERIAL**

Figure 1. Lack of data truncation up to 1900 birth cohort in Gerontology Research Group Database.

Figure 2. Similarity of age at death distributions between IDL and GRG databases for 1860-1888 birth cohorts.

Figure 3. Similarity of age at death distributions between later birth cohorts (1885-1898) in GRG database and earlier birth cohorts (1860-1888) in IDL.

Figure 1. Maximum reported age at death, by year of birth in Gerontology Research Group (GRG) database.

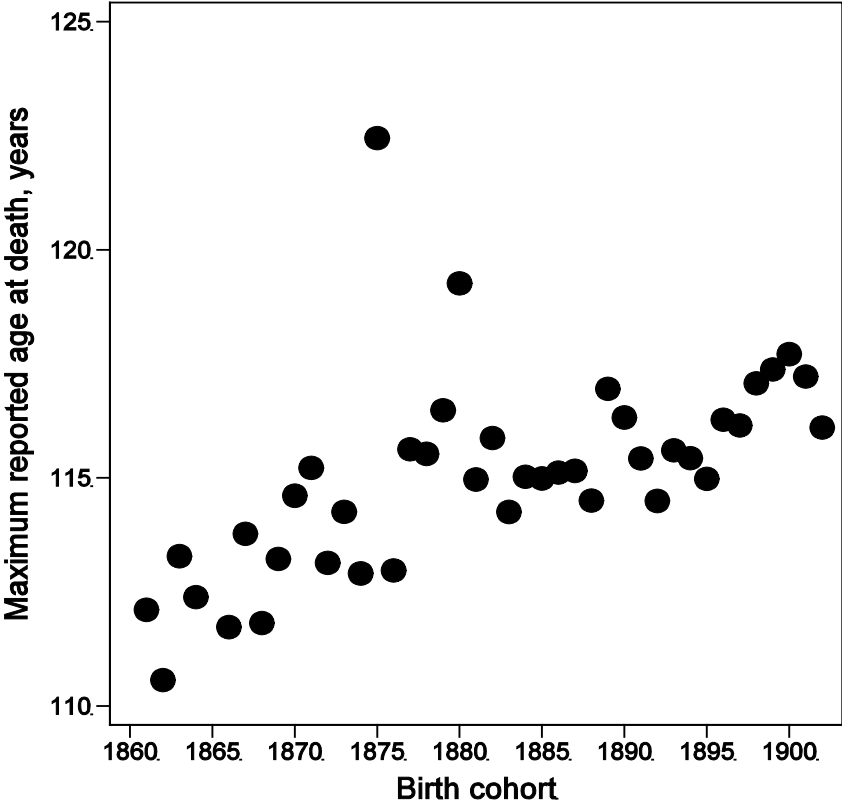

Figure 2. Proportion of deaths as a function of age in International Database on Longevity (IDL) and Gerontology Research Group (GRG) database for cohorts born in 1860-1888. Age is presented in quarterly intervals.

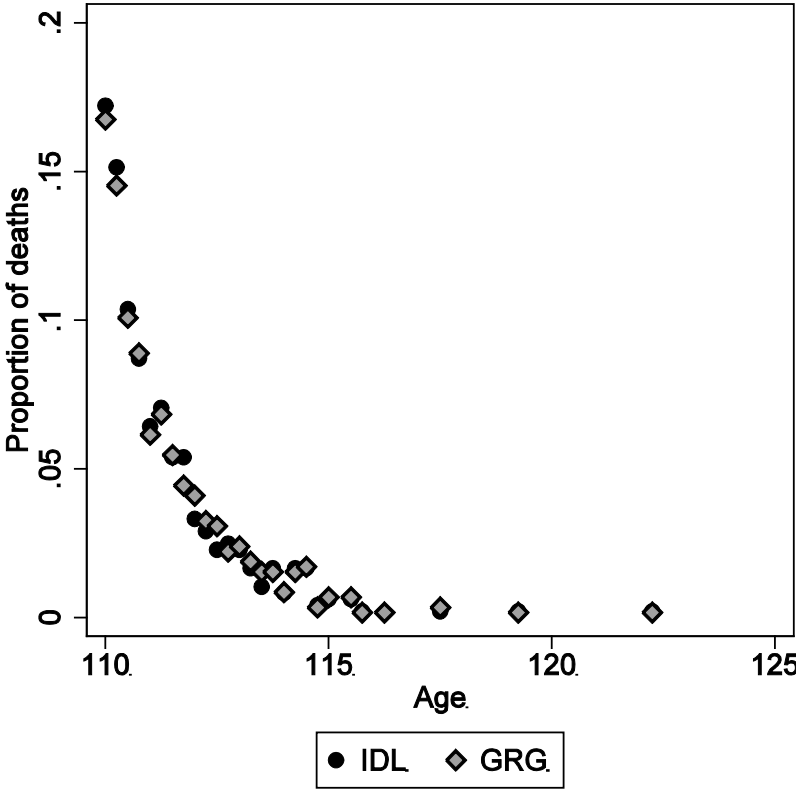

Figure 3. Proportion of deaths as a function of age in IDL (1860-1888 birth cohorts) and Gerontology Research Group database (1885-1898 birth cohorts). Age is presented in quarterly intervals.

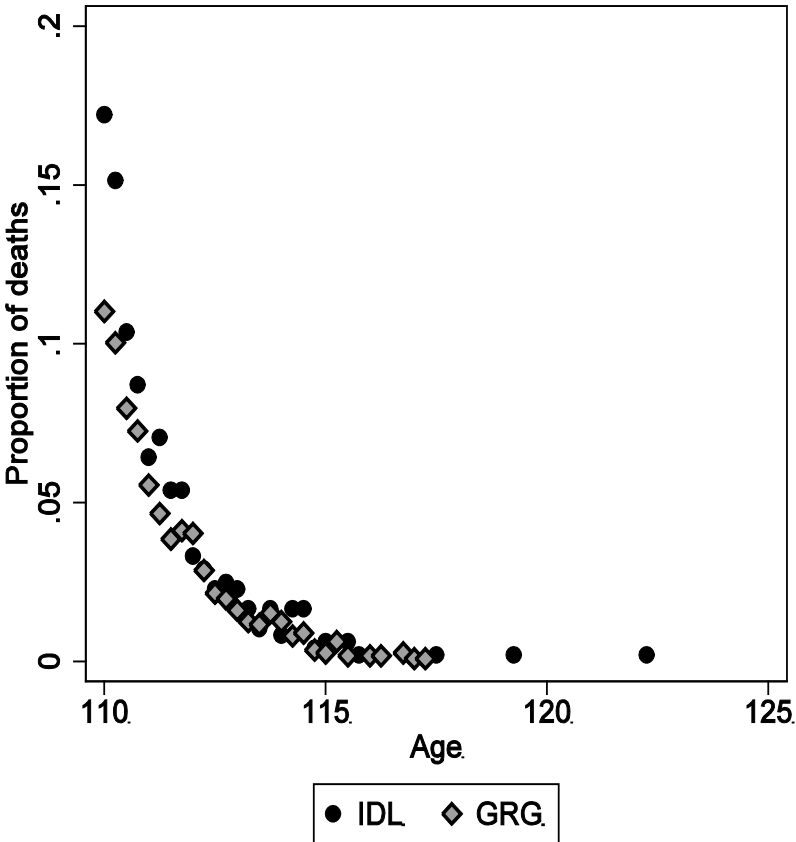

Supplement: glz164_suppl_supplementary_material.pdf [file glz164_suppl_supplementary_material.pdf]
